# Supplementary material for: Acknowledging uncertainty in evolutionary reconstructions of ecological niches [image]
Source: PubMed Central journal article supplement (PMC7391559; doi:10.1002/ece3.6359), 2020-06-27
Supplement: ECE3-10-6967-s001.pdf [file ECE3-10-6967-s001.pdf]

1 Reconstructing Ecological Niche Evolution via Ancestral State

2 Reconstruction with Uncertainty Incorporated

3

4 Supplementary Tables and Figures

5

6 **Supplementary Figure 1. Phylogeny of *Icterus orioles* (Powell et al. 2014) used in our**  
 7 **analyses.** Node labels correspond to row labels in Supplement 7 Figures 3-6. Asterisks denote  
 8 narrow-range Caribbean island endemics.

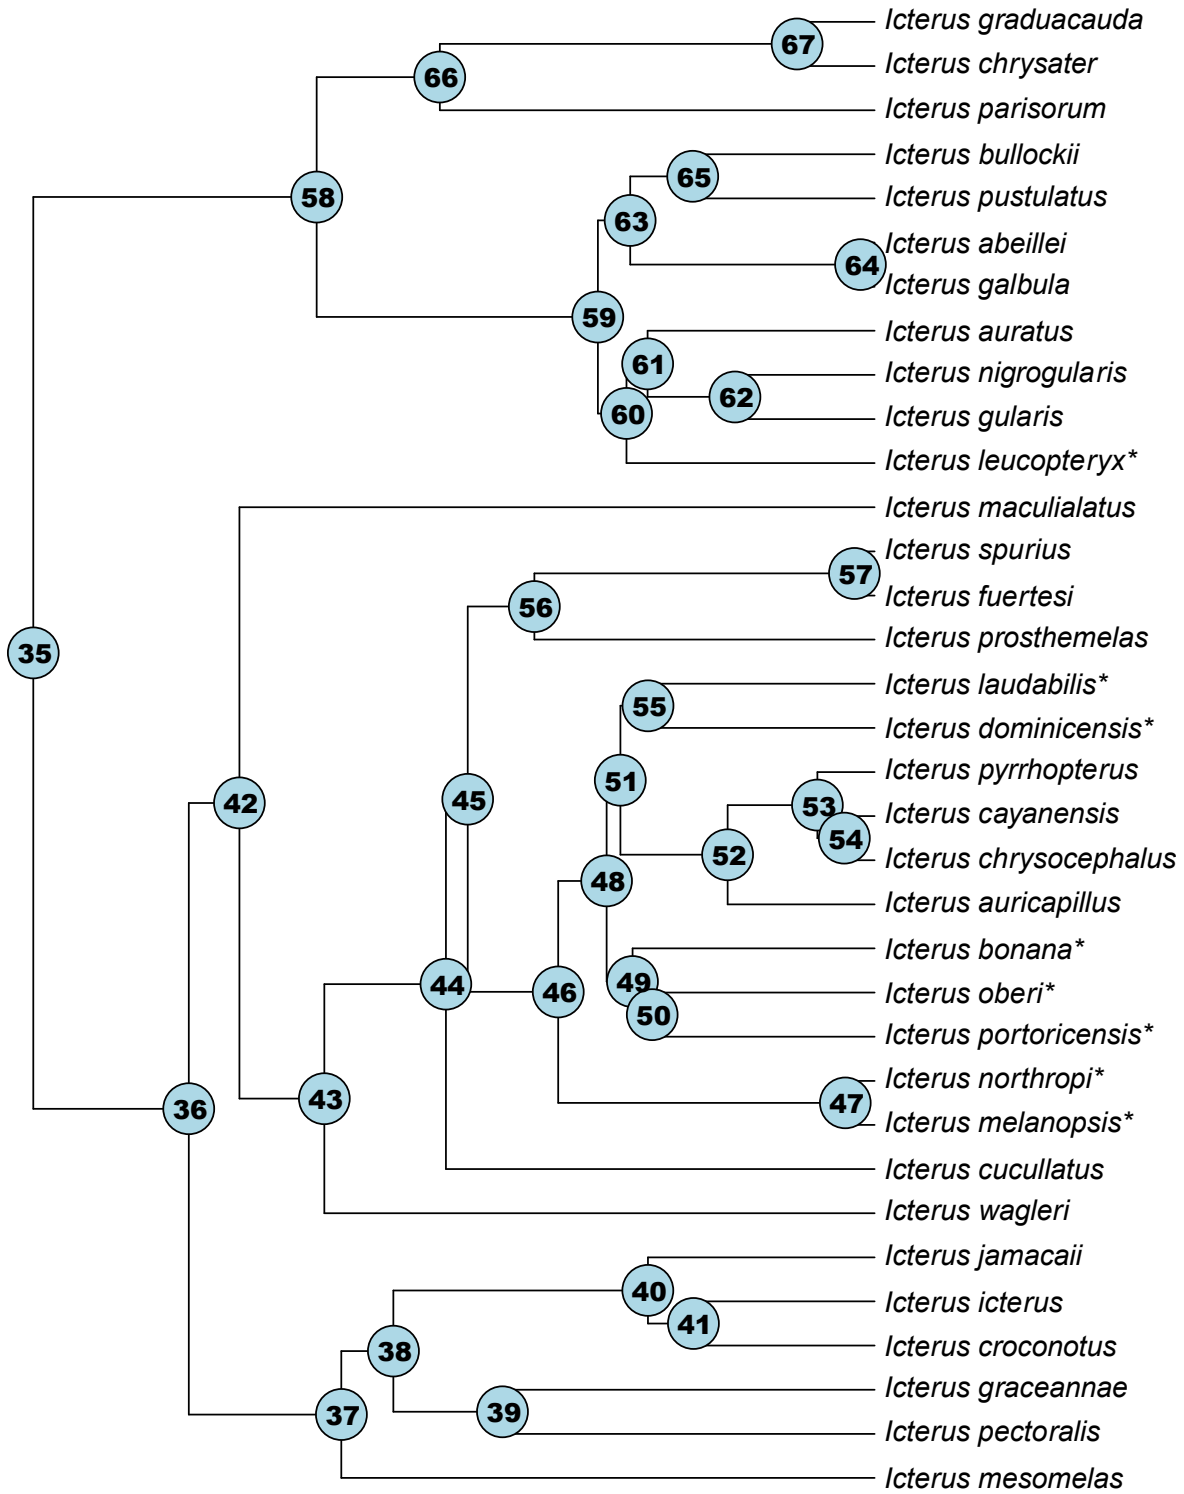

9

10 **Supplementary Figure 2. Bin-based coding of annual mean temperature niche for New**  
 11 **World Orioles (*Icterus spp.*).** Phylogenetic relationships (Supplemental Figure 1) plotted on left  
 12 side of figure. Dark red cells in a given row indicate bins that are inferred to be part of a species'  
 13 fundamental niche (1). Pale red cells contain values at the unknown periphery of a species'  
 14 fundamental niche (?). White cells are inferred to be values outside a species' fundamental niche  
 15 (0).

16

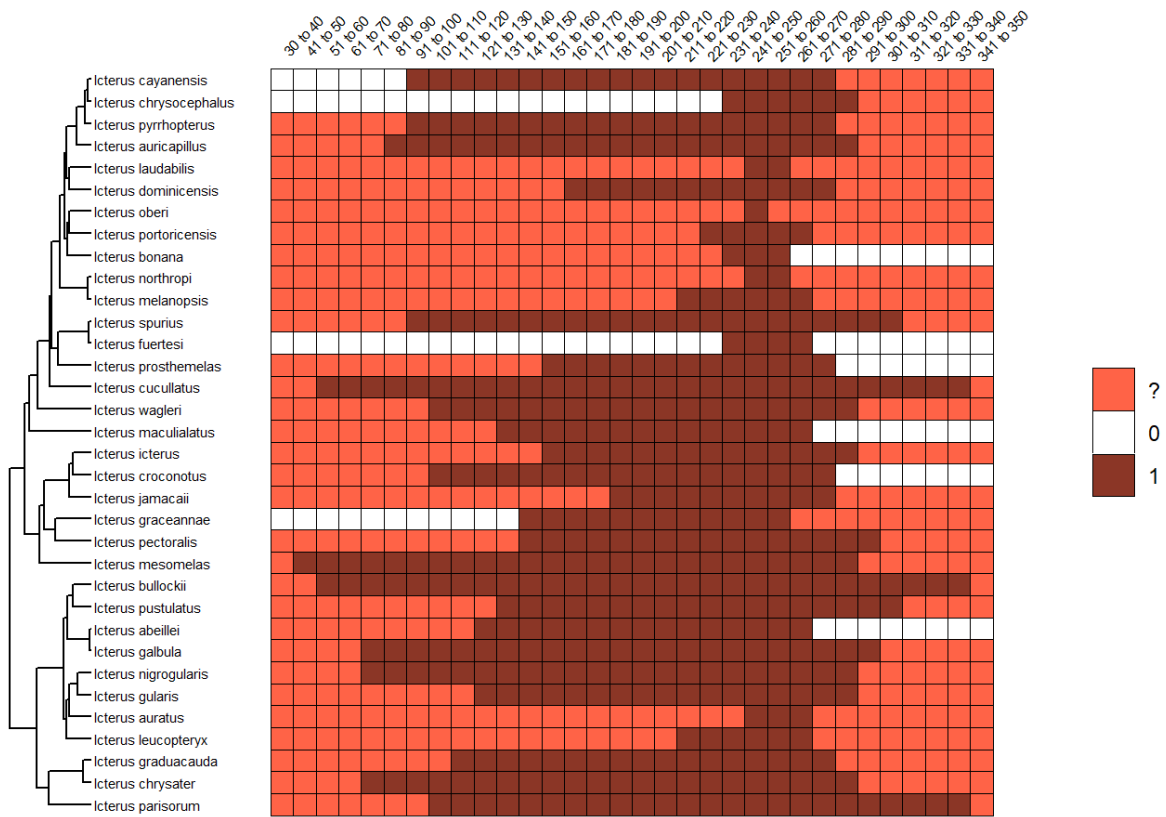

17  
18

19 **Supplementary Figure 3. Bin-based coding of annual precipitation niche for New World**  
 20 **Orioles (*Icterus spp.*).** Phylogenetic relationships (Supplemental Figure 1) plotted on left side of  
 21 figure. Dark blue cells in a given row indicate bins that are inferred to be part of a species'  
 22 fundamental niche (1). Pale blue cells contain values at the unknown periphery of a species'  
 23 fundamental niche (?). White cells are inferred to be values outside a species' fundamental niche  
 24 (0).

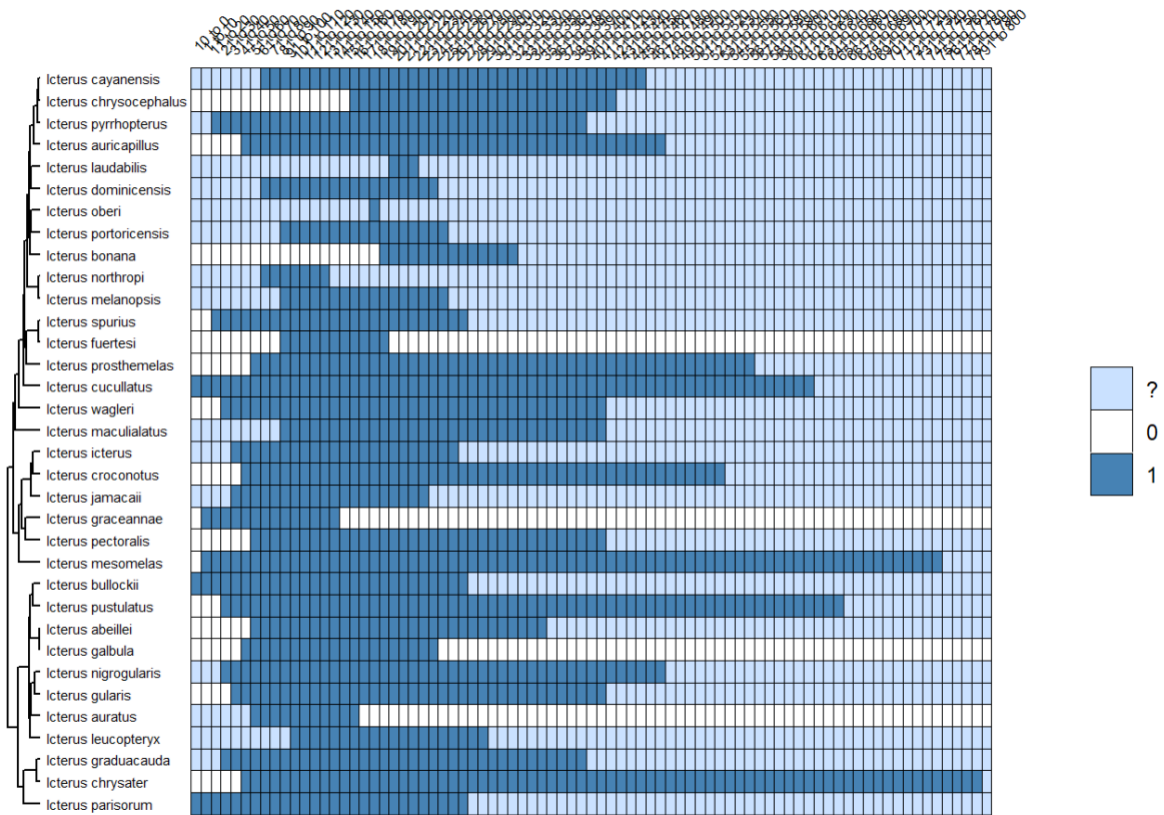

25  
 26  
 27

28 **Supplementary Table 1. Summary of New World oriole (*Icterus* spp.) occurrence data used**  
 29 **in ecological niche characterizations.** For migratory taxa (marked with an “x”), “Number”  
 30 reflects species’ breeding range occurrences.

31

| Species                       | Migratory | Number |
|-------------------------------|-----------|--------|
| <i>Icterus abeillei</i>       | x         | 572    |
| <i>Icterus auratus</i>        |           | 1224   |
| <i>Icterus auricapillus</i>   |           | 796    |
| <i>Icterus bonana</i>         |           | 40     |
| <i>Icterus bullockii</i>      | x         | 57978  |
| <i>Icterus cayanensis</i>     |           | 472    |
| <i>Icterus chrysater</i>      |           | 4818   |
| <i>Icterus chrysocephalus</i> |           | 37     |
| <i>Icterus croconotus</i>     |           | 1263   |
| <i>Icterus cucullatus</i>     | x         | 19458  |
| <i>Icterus dominicensis</i>   |           | 509    |
| <i>Icterus fuertesi</i>       |           | 38     |
| <i>Icterus galbula</i>        | x         | 180004 |
| <i>Icterus graceannae</i>     |           | 485    |
| <i>Icterus graduacauda</i>    |           | 2369   |
| <i>Icterus gularis</i>        |           | 8130   |
| <i>Icterus icterus</i>        |           | 1026   |
| <i>Icterus jamacaii</i>       |           | 545    |
| <i>Icterus laudabilis</i>     |           | 146    |
| <i>Icterus leucopteryx</i>    |           | 743    |
| <i>Icterus maculialatus</i>   |           | 318    |
| <i>Icterus melanopsis</i>     |           | 771    |
| <i>Icterus mesomelas</i>      |           | 2605   |
| <i>Icterus nigrogularis</i>   |           | 3298   |
| <i>Icterus northropi</i>      |           | 111    |
| <i>Icterus oberi</i>          |           | 89     |
| <i>Icterus parisorum</i>      | x         | 6599   |
| <i>Icterus pectoralis</i>     |           | 2085   |
| <i>Icterus portoricensis</i>  |           | 1163   |

32  
 33
